# Supplementary material
Source: HighWire-hosted journal article supplement (https://www.qdcxjkg.com/highwire/filestream/121524/field_highwire_adjunct_files/3/ERJ-00541-2015_Figure_S3.pdf)

**FIGURE S3.**

**(A) Prefrontal probe**

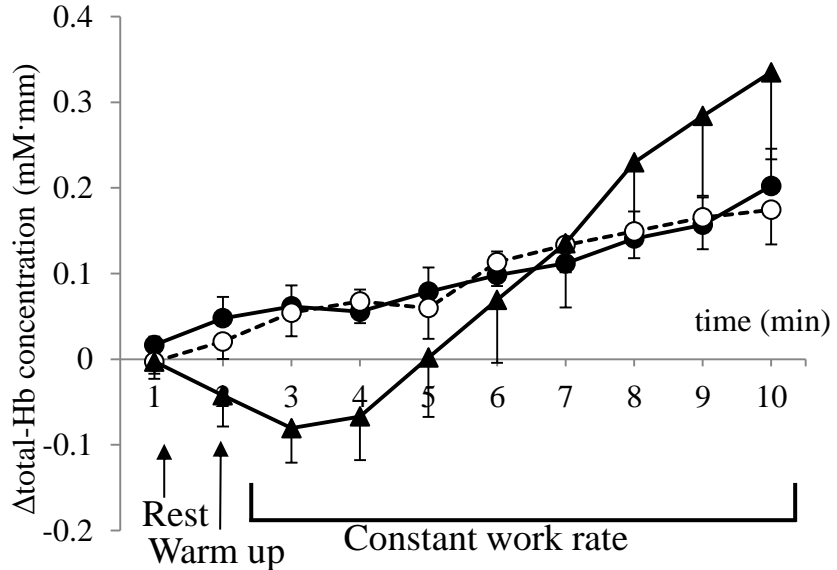

**(B) Left parietal probe**

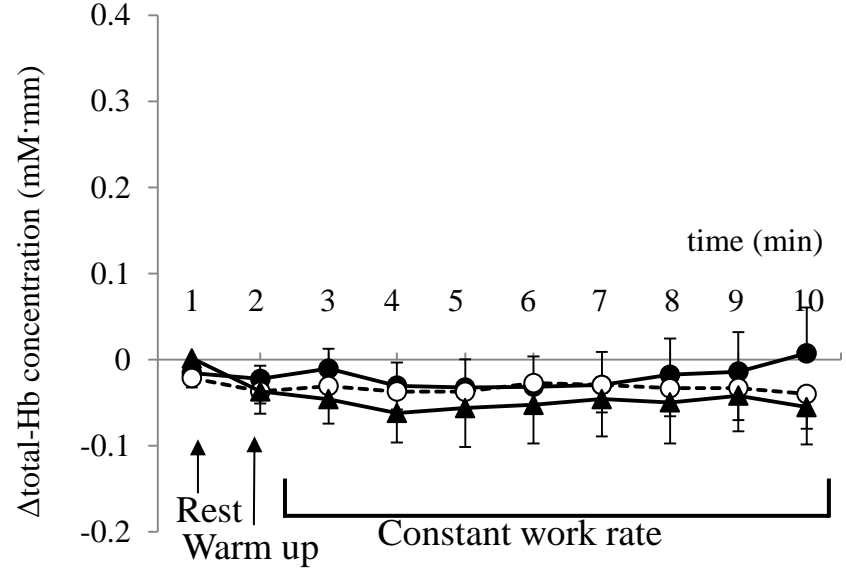

**(C) Right parietal probe**

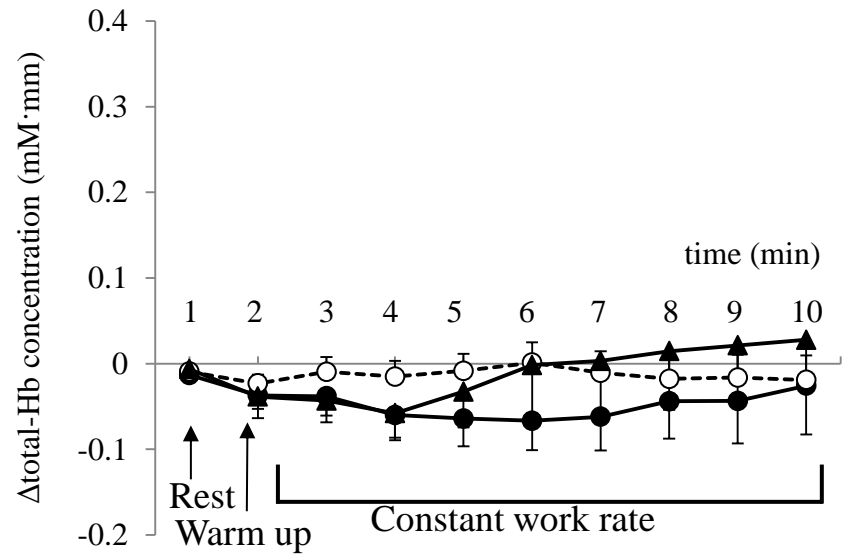

Supplement: ERJ-00541-2015_Figure_S3.pdf [file ERJ-00541-2015_Figure_S3.pdf]
